# Supplementary material
Source: PubMed Central journal article supplement (PMC4973578)

Supplementary Figure 1. Individual time courses of relative abundance of enterococci in stool specimens as assessed by 16s rRNA gene sequence analysis for patients, who never developed gastrointestinal GvHD (closed lines), and those that developed gastrointestinal GvHD (broken lines). In addition, patients showing active symptoms of GI GvHD at the time of sampling are indicated by triangles.

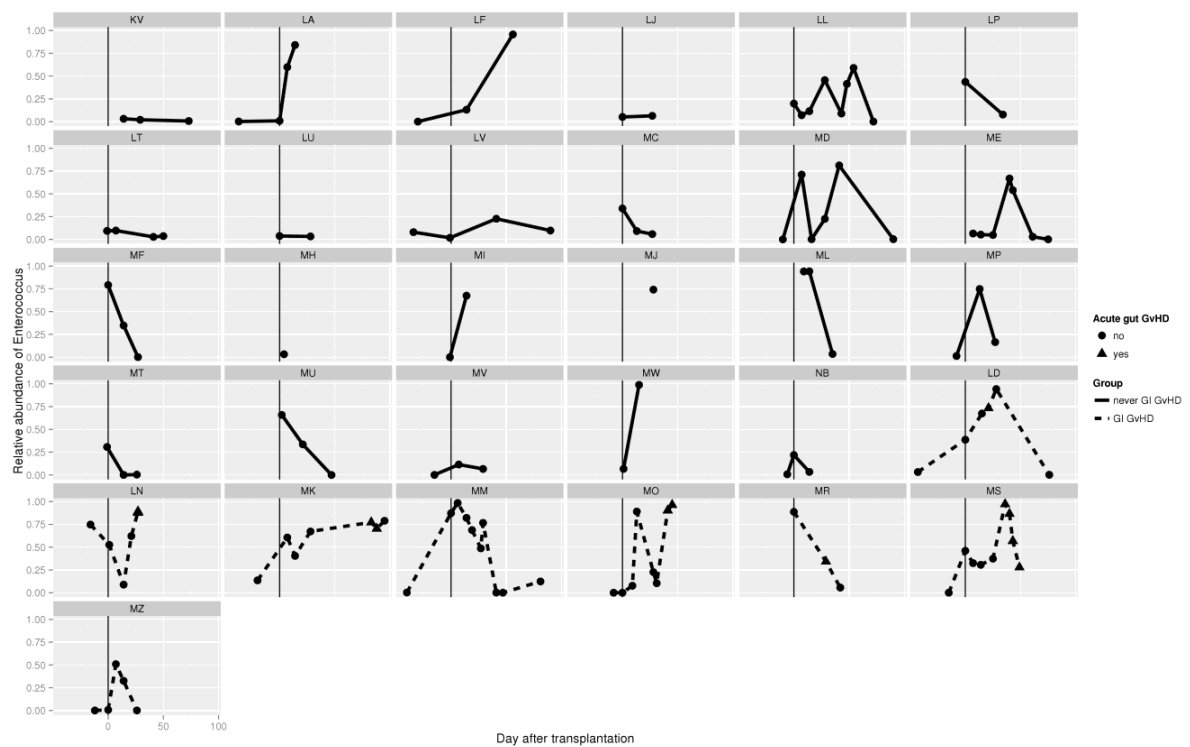

Supplement: NIHMS803398-supplement-Supplemental_data.pdf [file NIHMS803398-supplement-Supplemental_data.pdf]
